# Supplementary material for: Genetic Diversity, Population Structure, and Environmental Adaptation Signatures of Chinese Coastal Hard-Shell Mussel Mytilus coruscus Revealed by Whole-Genome Sequencing
Source: MDPI journal article supplement (doi:10.3390/ijms241713641), 2023-09-04
Supplement: s1 [file s1]

# Supplementary Information

## Genetic Diversity, Population Structure, and Environmental Adaptation Signatures of Chinese Coastal Hard-Shell Mussel *Mytilus coruscus* Revealed by Whole-Genome Sequencing

Feng Guo <sup>1,†</sup>, Yingying Ye <sup>1,†</sup>, Kecheng Zhu <sup>2</sup>, Shuangrui Lin <sup>1</sup>, Yuxia Wang <sup>3</sup>, Zhenyu Dong <sup>3</sup>, Ronghui Yao <sup>3</sup>, Hongfei Li <sup>1</sup>, Weifeng Wang <sup>3</sup>, Zhi Liao <sup>3</sup>, Baoying Guo <sup>1,3,\*</sup> and Xiaojun Yan <sup>1,3,\*</sup>

<sup>1</sup> National Engineering Research Center for Marine Aquaculture, Zhejiang Ocean University, Zhoushan 316022, China; agsguo@163.com (F.G.); yeyy@zjou.edu.cn (Y.Y.); citric-acid@foxmail.com (S.L.); lhf612@126.com (H.L.)

<sup>2</sup> Key Laboratory of South China Sea Fishery Resources Exploitation and Utilization, Ministry of Agriculture and Rural Affairs, South China Sea Fisheries Research Institute, Chinese Academy of Fishery Sciences, Guangzhou 510300, China; zhukecheng@scsfri.ac.cn

<sup>3</sup> Marine Science and Technology College, Zhejiang Ocean University, Zhoushan 316022, China; wangyuxia97@163.com (Y.W.); dongzhenyu2021@163.com (Z.D.); 17662452562@163.com (R.Y.); wangwf@zjou.edu.cn (W.W.); liaozhi@zjou.edu.cn (Z.L.)

\* Correspondence: guobaoying@zjou.edu.cn (B.G.); yanxj@zjou.edu.cn (X.Y.)

† These authors contributed equally to this work.

**Table. S1** The details of sampling

| Sample Site    | Abbr | Coordinate          | Sampling Date | Sample Size |
|----------------|------|---------------------|---------------|-------------|
| Dalian         | DL   | 38°92' N, 121°62' E | 2020.11       | 10          |
| Qingdao        | QD   | 35°12' N, 120°30' E | 2020.12       | 10          |
| Lianyungang    | LYG  | 34°60' N, 119°22' E | 2021.02       | 10          |
| Zhoushan       | ZS   | 30°12' N, 121°62' E | 2021.02       | 10          |
| Xiangshan      | XS   | 29°14' N, 121°58' E | 2021.03       | 10          |
| Yuhuan         | YH   | 28°14' N, 121°24' E | 2021.03       | 10          |
| Taishan Island | TS   | 26°57' N, 120°47' E | 2021.04       | 10          |
| Zhangzhou      | ZZ   | 24°52' N, 117°65' E | 2021.04       | 10          |
| Total          |      |                     |               | 80          |

**Table. S2** Population differentiation index ( $F_{ST}$ ) between two of the eight geographical populations

|     | QD     | LYG   | ZS     | XS     | YH        | TS      | ZZ    |
|-----|--------|-------|--------|--------|-----------|---------|-------|
| DL  | -0.001 | 0.010 | -0.001 | -0.002 | -0.002    | -0.002  | 0.002 |
| QD  |        | 0.011 | 0.001  | -0.001 | -0.001    | -0.002  | 0.014 |
| LYG |        |       | 0.021  | 0.011  | 0.012     | 0.011   | 0.031 |
| ZS  |        |       |        | -0.001 | -8.74E-05 | -0.0002 | 0.012 |
| XS  |        |       |        |        | -0.002    | -0.002  | 0.013 |
| YH  |        |       |        |        |           | -0.002  | 0.011 |
| TS  |        |       |        |        |           |         | 0.011 |

**Table. S3** Sample sequencing results and genome mapping rate statistics

**Table. S4-S5** The results of the selection signature analysis

**Table. S6-S7** GO enrichment results of selected genes in Zhangzhou

**Table. S8** Genome-wide nucleotide diversity data in bivalves

| Species                 | Pi                | Method                  | DOI                               |
|-------------------------|-------------------|-------------------------|-----------------------------------|
| Mytilus coruscus        | 0.0032-0.0038     | whole-genome sequencing |                                   |
| Crassostrea ariakensis  | 0.00033-0.00035   | whole-genome sequencing | 10.1038/s42003-021-02823-6.       |
| Crassostrea gigas       | 0.00927           | whole-genome sequencing | 10.1038/s42003-021-02823-6.       |
| Crassostrea ariakensis  | 0.0010-0.0012     | Whole genome sequencing | 10.1111/1755-0998.13556           |
| Mizuhopecten yessoensis | 0.000018-0.000023 | whole-genome sequencing | 10.1016/j.aquaculture.2021.737842 |

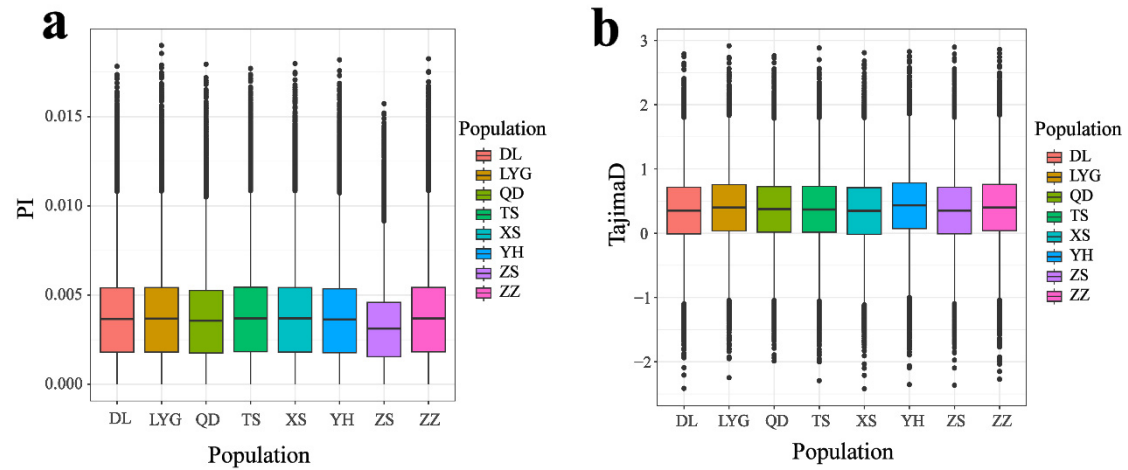

**Fig. S1** Nucleotide diversity index and neutrality test results. (a) Nucleotide diversity of the whole genome of hard-shell mussels from eight regions. (b) Tajima's D in the whole genome of eight regional hard-shell mussels.

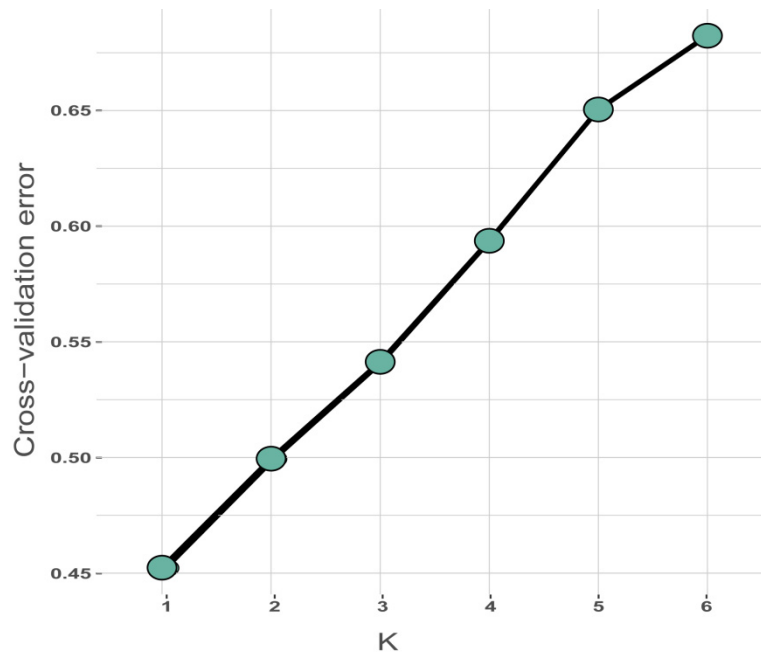

**Fig. S2** Relationship curve between K value and Cross-validation error value.

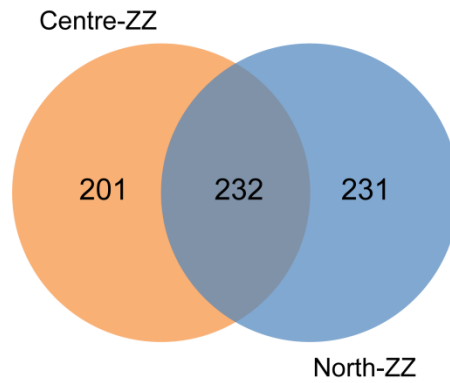

**Fig. S3** Overlapping candidate genes in Centre/ZZ and North/ZZ pairs based on Venn diagram.

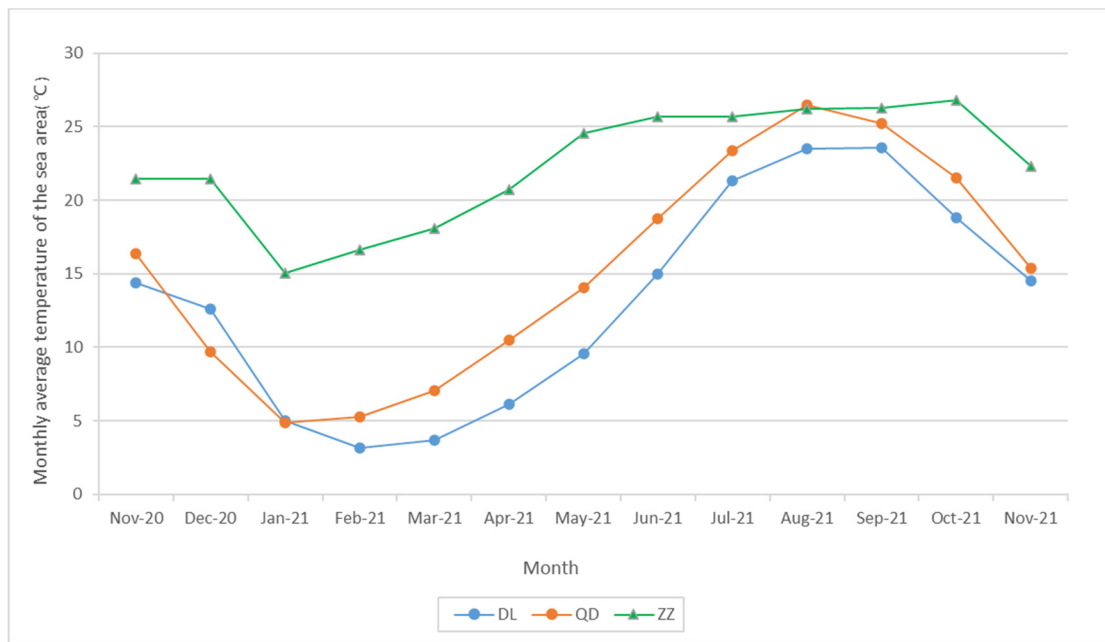

**Fig. S4** The monthly average sea surface temperature of three sampling sites (Dalian, Qingdao, and Zhangzhou) was determined through satellite remote sensing from November 2020 to November 2021. Data provided by China's National Science and Technology Resources Sharing Service Platform - National Data Center for Marine Science (<http://mds.nmdis.org.cn/>).
